# Supplementary material for: Approaches to estimate bidirectional causal effects using Mendelian randomization with application to body mass index and fasting glucose
Source: PubMed Central journal article supplement (PMC10923437; doi:10.1371/journal.pone.0293510), 2024-03-08
Supplement: pone.0293510.s002.pdf [file pone.0293510.s002.pdf]

## Derivation for bidirectional Mendelian randomization model

Recall, the bidirectional model is represented by joint system of equations:

$$Y_1 = \beta_{01} + \beta_{11}X_1 + \beta_{CY1}C + \gamma_{21}Y_2 + \varepsilon_1$$

$$Y_2 = \beta_{02} + \beta_{22}X_2 + \beta_{CY2}C + \gamma_{12}Y_1 + \varepsilon_2$$

In this model, the bidirectional relationship between  $Y_1$  and  $Y_2$  leads to a feedback loop between these two outcomes. After each feedback cycle, values of outcome variables  $Y_1$  and  $Y_2$  are altered. The transitional feedback steps are described in S1 Fig.

$$Y_{2.1} = \beta_{02} + \beta_{22}X_2 + \beta_{CY2}C + \gamma_{12}Y_{1.1} + \varepsilon_{2.1}$$

If we substitute the  $Y_{2.1}$  in the equation  $Y_{1.2}$ , we get:

$$\begin{aligned} Y_{1.2} &= \beta_{01} + \beta_{11}X_1 + \beta_{CY1}C + \gamma_{21}Y_{2.1} + \varepsilon_{1.2} \\ &= \beta_{01} + \beta_{11}X_1 + \beta_{CY1}C + \varepsilon_{1.2} + \gamma_{21}(\beta_{02} + \beta_{22}X_2 + \beta_{CY2}C + \gamma_{12}Y_{1.1} + \varepsilon_{2.1}) \\ &= \beta_{01} + \beta_{11}X_1 + \beta_{CY1}C + \varepsilon_{1.2} + \gamma_{21}(\beta_{02} + \beta_{22}X_2 + \beta_{CY2}C + \varepsilon_{2.1}) + \gamma_{12}\gamma_{21}Y_{1.1} \end{aligned}$$

We now substitute the  $Y_{1.2}$  in the equation  $Y_{2.2}$ , we get:

$$\begin{aligned} Y_{2.2} &= \beta_{02} + \beta_{22}X_2 + \beta_{CY2}C + \gamma_{12}Y_{1.2} + \varepsilon_{2.2} \\ &= \beta_{02} + \beta_{22}X_2 + \beta_{CY2}C + \varepsilon_{2.2} + \gamma_{12}(\beta_{01} + \beta_{11}X_1 + \beta_{CY1}C + \varepsilon_{1.2}) \\ &\quad + \gamma_{12}\gamma_{21}(\beta_{02} + \beta_{22}X_2 + \beta_{CY2}C + \varepsilon_{2.1}) + \gamma_{12}^2\gamma_{21}Y_{1.1} \end{aligned}$$

Resubstituting  $Y_{2.2}$  in the equation again  $Y_{1.3}$ , we get:

$$\begin{aligned} Y_{1.3} &= \beta_{01} + \beta_{11}X_1 + \beta_{CY1}C + \gamma_{21}Y_{2.2} + \varepsilon_{1.3} \\ &= \beta_{01} + \beta_{11}X_1 + \beta_{CY1}C + \varepsilon_{1.3} + \gamma_{21}(\beta_{02} + \beta_{22}X_2 + \beta_{CY2}C + \varepsilon_{2.2}) \\ &\quad + \gamma_{12}\gamma_{21}(\beta_{01} + \beta_{11}X_1 + \beta_{CY1}C + \varepsilon_{1.2}) + \gamma_{12}\gamma_{21}^2(\beta_{02} + \beta_{22}X_2 + \beta_{CY2}C + \varepsilon_{2.1}) \\ &\quad + \gamma_{12}^2\gamma_{21}^2Y_{1.1} \end{aligned}$$

After n substitutions, the coefficients can be represented as a geometric series as follows:

$$\begin{aligned}
Y_{1.n} = & (\beta_{01} + \beta_{11}X_1 + \beta_{CY1}C)(1 + \gamma_{12}\gamma_{21} + (\gamma_{12}\gamma_{21})^2 + \dots + (\gamma_{12}\gamma_{21})^{n-1}) \\
& + \gamma_{21}(\beta_{02} + \beta_{22}X_2 + \beta_{CY2}C)(1 + \gamma_{12}\gamma_{21} + (\gamma_{12}\gamma_{21})^2 + \dots + (\gamma_{12}\gamma_{21})^{n-1}) \\
& + (\gamma_{12}\gamma_{21})^n Y_1 + \varepsilon_{1.n}
\end{aligned}$$

When  $|\gamma_{12}\gamma_{21}| < 1$  and  $n$  goes infinite,  $(\gamma_{12}\gamma_{21})^n$  converges to 0 and  $Y_1$  can be written as:

$$Y_1 = \frac{\beta_{01} + \gamma_{21}\beta_{02}}{1 - \gamma_{12}\gamma_{21}} + \frac{\gamma_{21}\beta_{CY2} + \beta_{CY1}}{1 - \gamma_{12}\gamma_{21}} C + \frac{\beta_{11}}{1 - \gamma_{12}\gamma_{21}} X_1 + \frac{\gamma_{21}\beta_{11}}{1 - \gamma_{12}\gamma_{21}} X_2 + \delta_1$$

Similarly,  $Y_2$  can be written as:

$$Y_2 = \frac{\beta_{02} + \gamma_{12}\beta_{01}}{1 - \gamma_{12}\gamma_{21}} + \frac{\gamma_{12}\beta_{CY1} + \beta_{CY2}}{1 - \gamma_{12}\gamma_{21}} C + \frac{\beta_{22}}{1 - \gamma_{12}\gamma_{21}} X_2 + \frac{\gamma_{12}\beta_{22}}{1 - \gamma_{12}\gamma_{21}} X_1 + \delta_2$$

### MR assumptions

Although the relationship between  $Y_1$  and  $Y_2$  is recursive, the instruments variables  $X_1$  and  $X_2$  are chosen for the observed data  $Y_1$  and  $Y_2$  such that MR assumption are satisfied. Particularly, we chose  $X_1$  directly associated with  $Y_1$  but is not associated with  $Y_2$  conditional on  $Y_1$ . The instrumental variable  $X_2$  was chosen similarly.
